# Supplementary material for: Ammonia and Nematode Ascaroside Are Synergistic in Trap Formation in Arthrobotrys oligospora
Source: MDPI journal article supplement (doi:10.3390/pathogens12091114), 2023-08-31
Supplement: s1 [file s1]

Supplementary Materials:

**Table S1.** List of primers in this study.

| Primers            | Sequence (5'-3')                                    | Description             |
|--------------------|-----------------------------------------------------|-------------------------|
| <i>Amt43</i> -5F   | GTAACGCCAGGGTTTTCCAGTCACGACGCTCGTTAGGACCAGCACTATGT  | <i>AoAmt43</i> 5' flank |
| <i>Amt43</i> -5R   | ATCCACTTAACGTTACTGAAATCTCCAACACCAACCATCAAGGCGTAGG   |                         |
| <i>Amt43</i> -3F   | CTCCTTCAATATCATCTTCTGTCTCCGACTCACTGTCACCTGTCTCATTCT | <i>AoAmt43</i> 3' flank |
| <i>Amt43</i> -3R   | GCGGATAACAATTTACACAGGAAACAGCCGAACACGAGCACATACATAGA  |                         |
| <i>Hph</i> -F      | GTCGGAGACAGAAGATGATATTGAAGGAGC                      | HPH                     |
| <i>Hph</i> -R      | GTTGGAGATTTCAGTAACGTTAAGTGGAT                       |                         |
| <i>Amt43ko</i> _F  | CTCGGGACAATCTTCCTCTG                                | Probe of Southern blot  |
| <i>Amt43ko</i> _R  | CGTATGCGAGGATAGCAACA                                |                         |
| <i>Amt43P</i> -F   | GCTCTCCGTAAGGATGCTTCGCAGGTATCGCGCATATAC             | Promoter                |
| <i>Amt43P</i> -R   | CTCCTCGCCCTTGCTCACCATAGTTAGGTATAAGTCGGTGAC          |                         |
| <i>Amt43</i> -F    | GTCACCGACTTATACCTAACTATGTCGGCTGAAGAGCCAAT           | <i>Amt43</i>            |
| <i>Amt43</i> -R    | CCTCGCCCTTGCTCACCATCTACGGTTTCGTTCTACCTGA            |                         |
| <i>Amt43T</i> -F   | TCACGGCATGGACGAGCTGTACAAGTAAAATGATCGTCTTCTGCTTTGG   | terminator              |
| <i>Amt43T</i> -R   | ATCCCCGGGCTGCAGGAATTCCTGTATCTTGCAGAATGG             |                         |
| <i>Amt43</i> Nat-F | TTGGAGCCGAAATCCGCATGGACATGGAGGCCCAAGATAC            | Norsmectin fragment     |
| <i>Amt43</i> Nat-R | AAGTCCGGCACCTCGTGCAGTATAGCGACCAGCATTC               |                         |

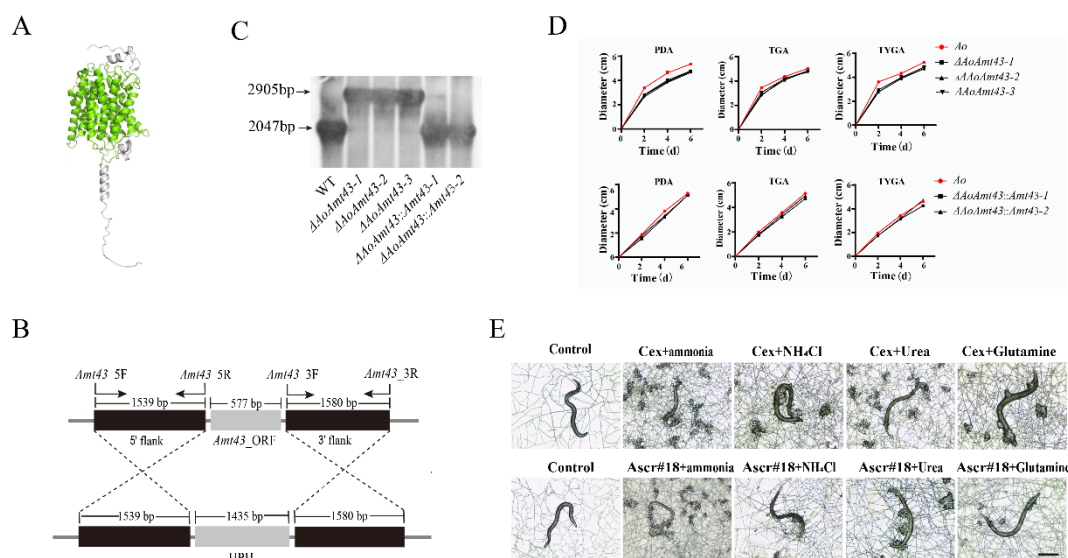

**Figure S1.** Protein structure analysis of Amt43 and its knockout. (A) Protein structure of Amt43; (B) Amt43 knockout programme. (C) Southern blot validation of  $\Delta$  *AoAmt43* and  $\Delta$  *AoAmt43::Amt43*. (D) Mycelial growth in the WT,  $\Delta$  *AoAmt43* and  $\Delta$  *AoAmt43::Amt43* on PDA, TGA, or TYGA media for 6 days. (E) Comparison of nematode pathogenicity of traps induced by nematode extracts and nitrogen signalling mixtures against nematodes, and comparison of nematode pathogenicity of traps induced by Ascr#18 and nitrogen signalling mixtures against nematodes (Bar=100  $\mu$ m ).
